# Supplementary material for: Prevalence of Chronic Kidney Disease and Variation of Its Risk Factors by the Regions in Okayama Prefecture
Source: MDPI journal article supplement (doi:10.3390/jpm12010097), 2022-01-12
Supplement: s1 [file s1]

Supplementary Materials:

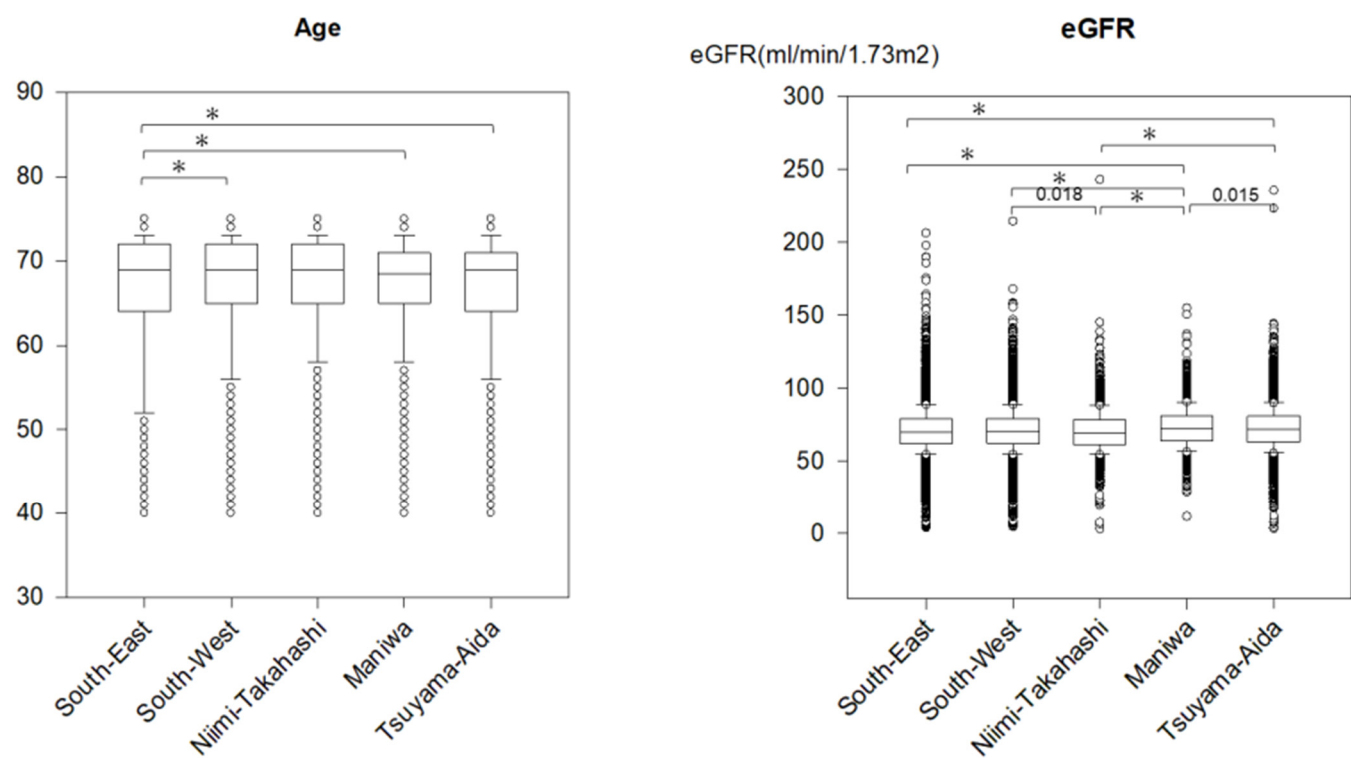

Figure S1. Actual value of age and eGFR.  $p < 0.001$

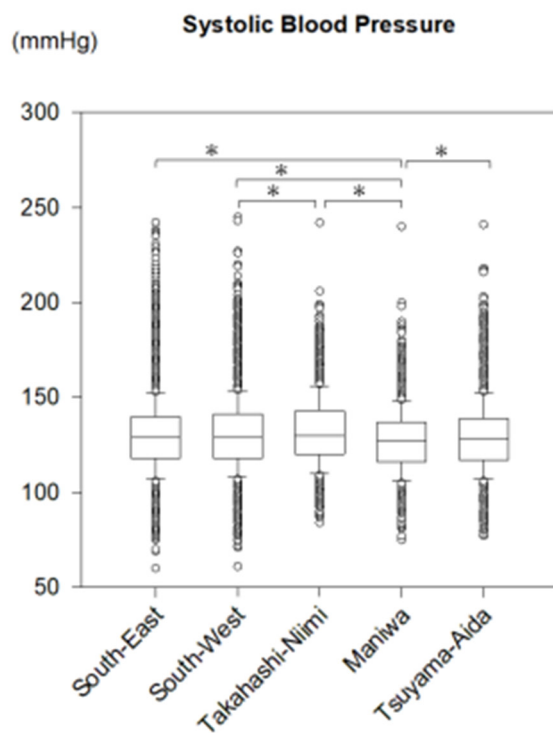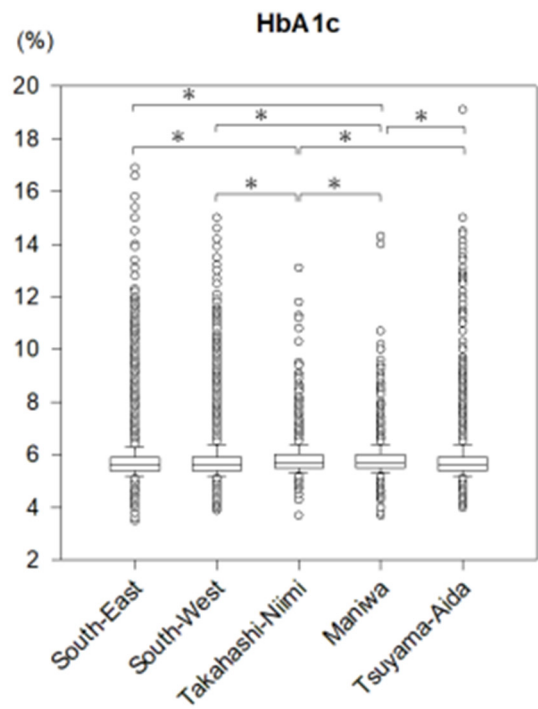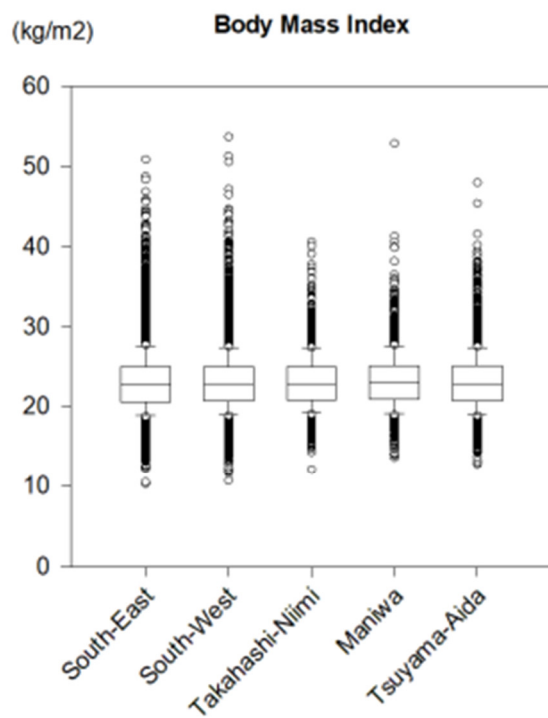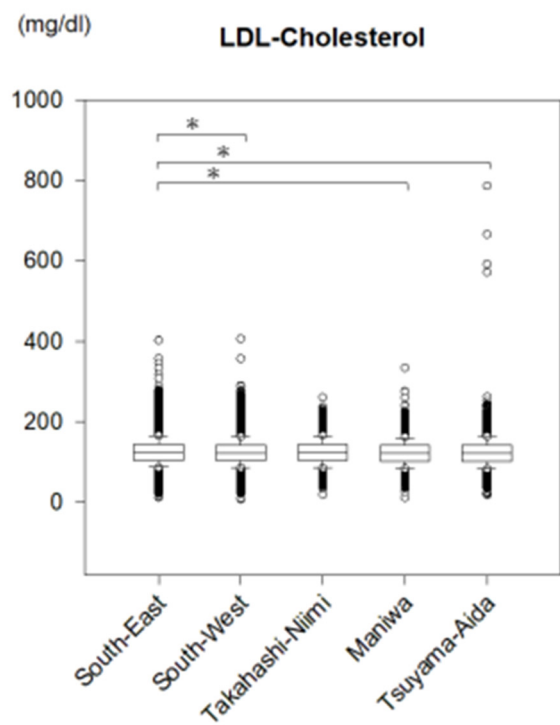

**Figure S2.** Actual values of systolic blood pressure, HbA1c, Body mass index and LDLcholesterol.  $p < 0.001$ .
